# Supplementary material for: Heterologous Production in the Synechocystis Chassis Suggests the Biosynthetic Pathway of Astaxanthin in Cyanobacteria
Source: MDPI journal article supplement (doi:10.3390/antiox12101826), 2023-10-03
Supplement: s1 [file s1]

**Table S1.** Primers used in this study.

| Name              | Sequence (5'-3')                    |
|-------------------|-------------------------------------|
| F <sub>CrtZ</sub> | atgctagtaaatagtttaatcgtcaccttg      |
| R <sub>CrtZ</sub> | ttattcgggcgaagacgacga               |
| F <sub>CrtO</sub> | gctattcaatgtttatggaggactgacctag     |
| R <sub>CrtO</sub> | accaatacccgtttgacggtttg             |
| RbcLpro-F         | tcaccatttgacaaaacatcagg             |
| RbcLpro-R         | ctaggtcagtcctccataaacattgaa         |
| PsbA2pro-F        | ggtatatggatcataattgtatgcccgact      |
| PsbA2pro-R        | ttggtataattccttatgtattgtcgatgttcaga |
